# Supplementary material for: MBL-II-141, a chromone derivative, enhances irinotecan (CPT-11) anticancer efficiency in ABCG2-positive xenografts
Source: PubMed Central journal article supplement (PMC4323000; doi:10.18632/oncotarget.2566), 2015-01-20
Supplement: oncotarget-05-11957-s001.pdf [file oncotarget-05-11957-s001.pdf]

**SUPPLEMENTARY TABLES AND FIGURES**

**Supplementary Table S1: Significance of the differences observed between the growth of tumors treated by either vehicles (corn oil/5% DMSO and PBS) or MBL-II-141 alone (at 10 mg/kg and PBS). Tumors were treated just after their onset. The growth curves of tumors were submitted to paired t-test, as described in the Methods section.**

|                             | <b>HEK-pcDNA3.1</b> | <b>HEK-ABCG2</b> |
|-----------------------------|---------------------|------------------|
| <b>P value (two tailed)</b> | <b>0.0006</b>       | <b>0.015</b>     |
| t                           | 4.220               | 2.688            |
| df                          | 17                  | 18               |
| Number of pairs             | 18                  | 19               |
| <b>Mean of differences</b>  | <b>342</b>          | <b>77.51</b>     |
| 95% confidence interval     | 171.0 to 512.9      | 16.93 to 138.1   |
| R squared                   | 0.5116              | 0.2864           |
| Correlation coefficient (r) | 0.629               | 0.9499           |
| P value (one tailed)        | < 0.0001            | < 0.0001         |

**Supplementary Table S2: Significance of the differences observed between the growth of ABCG2-positive tumors.** Tumors were treated when one reached a diameter of 8 mm. Growth curves of tumors were submitted to paired t-test, as described in the Methods section.

|                                 | <b>Solvents versus<br/>MBL-II-141</b> | <b>Solvents versus<br/>CPT-11</b> | <b>Solvents versus<br/>MBL-II-141 +<br/>CPT-11</b> | <b>MBL-II-141<br/>versus MBL-<br/>II-141 + CPT-11</b> | <b>CPT-11 versus<br/>MBL-II-141 +<br/>CPT-11</b> |
|---------------------------------|---------------------------------------|-----------------------------------|----------------------------------------------------|-------------------------------------------------------|--------------------------------------------------|
| <b>P value<br/>(two tailed)</b> | <b>&lt; 0.0001</b>                    | <b>&lt; 0.0001</b>                | <b>&lt; 0.0001</b>                                 | <b>&lt; 0.0001</b>                                    | <b>&lt; 0.0001</b>                               |
| t, df                           | 4.773                                 | 4.641                             | 4.553                                              | 5.009                                                 | 5.909                                            |
| df                              | 41                                    | 41                                | 41                                                 | 48                                                    | 51                                               |
| Number of pairs                 | 42                                    | 42                                | 42                                                 | 49                                                    | 52                                               |
| <b>Mean of<br/>differences</b>  | <b>94.84</b>                          | <b>170.7</b>                      | <b>318.6</b>                                       | <b>401.4</b>                                          | <b>245.8</b>                                     |
| 95% confidence<br>interval      | 54.71 to 135.0                        | 96.40 to 245.0                    | 177.3 to 460.0                                     | 240.1 to 562.7                                        | 162.2 to 329.4                                   |
| R squared                       | 0.3572                                | 0.3444                            | 0.3358                                             | 0.3433                                                | 0.4064                                           |
| Correlation<br>coefficient (r)  | 0.9658                                | 0.8997                            | 0.9062                                             | 0.9248                                                | 0.8922                                           |
| P value<br>(one tailed)         | < 0.0001                              | < 0.0001                          | < 0.0001                                           | < 0.0001                                              | < 0.0001                                         |

**Supplementary Table S3: Significance of the differences observed in CPT-11, SN-38 or MBL-II-141 levels.** Mice were treated by CPT-11 and MBL-II-141 either alone or in combination. The levels obtained in blood, brain and liver were compared for mice treated with each compound or with their combination. The levels quantified over time were submitted to paired t-test as described in the Methods section.

|                                                           | Blood            | Brain             | Liver           |
|-----------------------------------------------------------|------------------|-------------------|-----------------|
| <b>CPT-11 (CPT-11 versus CPT-11 + MBL-II-141)</b>         |                  |                   |                 |
| <b>P value (two tailed)</b>                               | <b>0.3616</b>    | <b>0.0416</b>     | <b>0.6878</b>   |
| t, df                                                     | 1.004            | 2.724             | 0.4260          |
| df                                                        | 5                | 5                 | 5               |
| Number of pairs                                           | 6                | 6                 | 6               |
| <b>Mean of differences</b>                                | <b>-220.0</b>    | <b>-2.085</b>     | <b>-28.86</b>   |
| 95% confidence interval                                   | -783.7 to 343.6  | -4.053 to -0.1168 | -203.0 to 145.3 |
| R squared                                                 | 0.1677           | 0.5974            | 0.03503         |
| Correlation coefficient (r)                               | 0.9540           | 0.9330            | 0.7830          |
| P value (one tailed)                                      | < 0.0001         | < 0.0001          | 0.0013          |
| <b>SN-38 (CPT-11 versus CPT-11 + MBL-II-141)</b>          |                  |                   |                 |
| <b>P value (two tailed)</b>                               | <b>0.0299</b>    |                   | <b>0.1727</b>   |
| t, df                                                     | 3.300            |                   | 1.658           |
| df                                                        | 4                |                   | 4               |
| Number of pairs                                           | 5                |                   | 5               |
| <b>Mean of differences</b>                                | <b>-109.6</b>    |                   | <b>-12.65</b>   |
| 95% confidence interval                                   | -201.8 to -17.42 |                   | -33.83 to 8.533 |
| R squared                                                 | 0.7314           |                   | 0.4072          |
| Correlation coefficient (r)                               | 0.8739           |                   | 0.8318          |
| P value (one tailed)                                      | 0.0005           |                   | 0.0014          |
| <b>MBL-II-141 (MBL-II-141 versus CPT-11 + MBL-II-141)</b> |                  |                   |                 |
| <b>P value (two tailed)</b>                               | <b>0.1555</b>    | <b>0.1059</b>     | <b>0.1046</b>   |
| t, df                                                     | 1.671            | 1.970             | 1.980           |
| df                                                        | 5                | 5                 | 5               |
| Number of pairs                                           | 6                | 6                 | 6               |
| <b>Mean of differences</b>                                | <b>122.0</b>     | <b>38.53</b>      | <b>-39.78</b>   |
| 95% confidence interval                                   | -65.65 to 309.6  | -11.75 to 88.80   | -91.44 to 11.88 |
| R squared                                                 | 0.3584           | 0.4371            | 0.4394          |
| Correlation coefficient (r)                               | 0.5701           | 0.5008            | 0.3638          |
| P value (one tailed)                                      | 0.0427           | 0.0848            | 0.1679          |

**Supplementary Table S4: Changes in CPT-11, SN-38 or MBL-II-141 levels as induced by the combination treatment.** Liver or brain levels were related to plasma levels in each mouse. Fold-change values were expressed regarding ratios obtained for treatment with one molecule (i.e. MBL-II-141 or CPT-11) compared to those obtained for treatment with combined molecules.

| Time (min) | Liver/Plasma ratio |       |            | Brain/Plasma ratio |            |
|------------|--------------------|-------|------------|--------------------|------------|
|            | CPT-11             | SN-38 | MBL-II-141 | CPT-11             | MBL-II-141 |
| 30         | 1.3                | 0.9   | 2.5        | 2.2                | 1.1        |
| 60         | 0.7                | 0.6   | 0.8        | 2.6                | 0.3        |
| 120        | 1.1                | 1.1   | 1.1        | 2.2                | 0.4        |
| 240        | 0.6                | 1.0   | 3.0        | 1.4                | 3.0        |
| 480        | 1.8                | 1.0   | N.D.       | 4.3                | N.D.       |

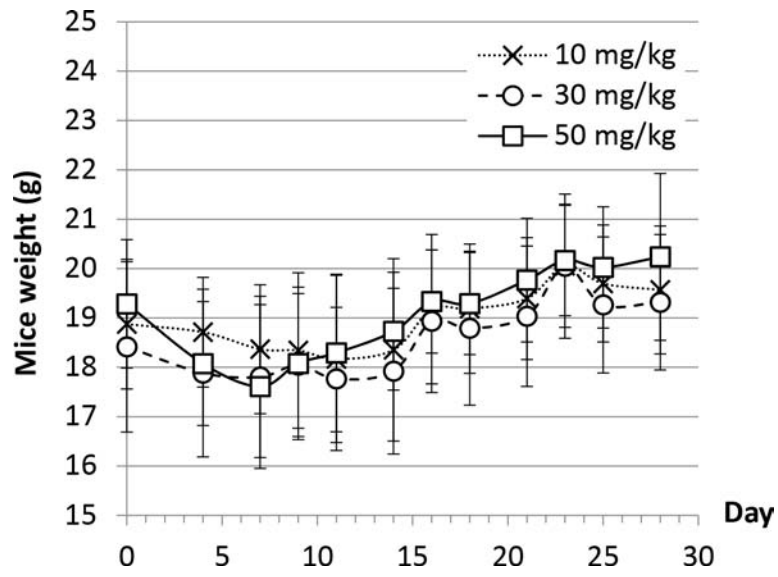

**Supplementary Figure S1: Effects of MBL-II-141 on mice weight over a one-month treatment.** MBL-II-141 was administered at 10, 30 or 50 mg/kg, 3 times a week, through intraperitoneal injections.

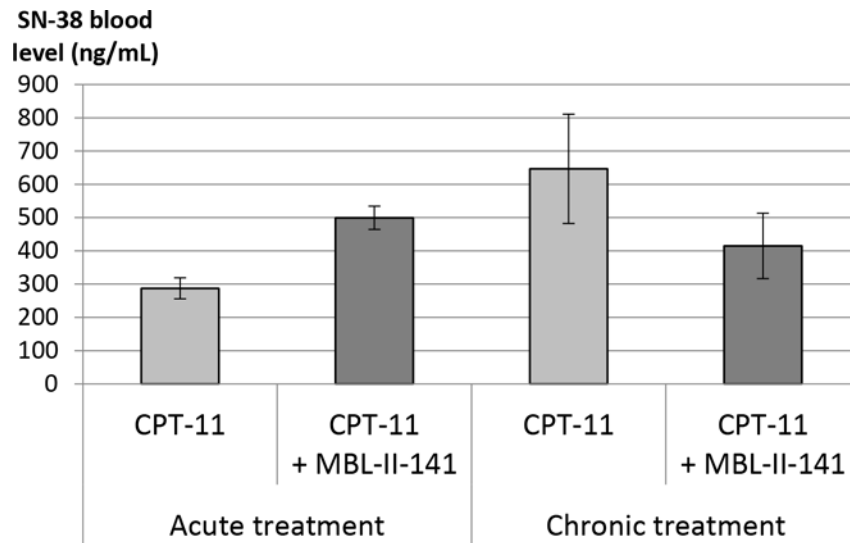

**Supplementary Figure S2: Effects of MBL-II-141 chronic treatment on SN-38 blood levels.** MBL-II-141 (10 mg/kg) in combination or not with CPT-11 (20 mg/kg) was administered to animals chronically treated (3 times a week for 40 days approximately, through intraperitoneal injections) or to acute treatment. SN-38 blood levels were quantified two hours after the last injection.
